# Supplementary material for: Towards Intelligent Drug Design System: Application of Artificial Dipeptide Receptor Library in QSAR-Oriented Studies
Source: PubMed Central journal article supplement (PMC6222794; doi:10.3390/molecules23081964), 2018-08-06
Supplement: molecules-23-01964-s001.pdf [file molecules-23-01964-s001.pdf]

## Supplementary Materials

# Towards Intelligent Drug Design System: Application of Artificial Dipeptide Receptor Library in QSAR-Oriented Studies

Andrzej Bak <sup>1,\*</sup>, Violetta Kozik <sup>1</sup>, Malgorzata Walczak <sup>2</sup>, Justyna Fraczyk <sup>2</sup>, Zbigniew Kaminski <sup>2</sup>, Beata Kolesinska <sup>2</sup>, Adam Smolinski <sup>3</sup>, Josef Jampilek <sup>4,\*</sup>

<sup>1</sup> Department of Synthesis Chemistry, Faculty of Mathematics, Physics and Chemistry, University of Silesia, Szkolna 9, 40007 Katowice, Poland; [violetta.kozik@us.edu.pl](mailto:violetta.kozik@us.edu.pl)

<sup>2</sup> Institute of Organic Chemistry, Lodz University of Technology, Zeromskiego 116, 90924 Lodz, Poland; [malgorzata.walczak@p.lodz.pl](mailto:malgorzata.walczak@p.lodz.pl) (M.W.), [justyna.fraczyk@p.lodz.pl](mailto:justyna.fraczyk@p.lodz.pl) (J.F.), [zbigniew.kaminski@p.lodz.pl](mailto:zbigniew.kaminski@p.lodz.pl) (Z.K.), [beata.kolesinska@p.lodz.pl](mailto:beata.kolesinska@p.lodz.pl) (B.K.)

<sup>3</sup> Central Mining Institute, Gwarkow 1, 40166 Katowice, Poland; [asmolinski@gig.katowice.pl](mailto:asmolinski@gig.katowice.pl) (A.S.)

<sup>4</sup> Department of Pharmaceutical Chemistry, Faculty of Pharmacy, Comenius University, Odbojarov 10, 83232 Bratislava, Slovakia

\* Correspondence: [andrzej.bak@us.edu.pl](mailto:andrzej.bak@us.edu.pl) (A.B.); [josef.jampilek@gmail.com](mailto:josef.jampilek@gmail.com) (J.J.)

**Table S1.** Molecular descriptors calculated with Sybyl software.

| L.p. | polar surface area | volume   | polar volume | acceptor count | clogP   | donor count | Ro5 violations | molecular weight | rotatable bond count |
|------|--------------------|----------|--------------|----------------|---------|-------------|----------------|------------------|----------------------|
| 1.   | 63.824             | 1058.514 | 297.659      | 7              | 3.9438  | 1           | 0              | 348.8305         | 6                    |
| 2.   | 63.913             | 1113.909 | 294.349      | 7              | 4.4428  | 1           | 0              | 362.8571         | 6                    |
| 3.   | 59.635             | 1121.490 | 307.347      | 7              | 3.4128  | 1           | 0              | 362.8571         | 7                    |
| 4.   | 59.223             | 1072.394 | 313.306      | 7              | 3.5518  | 1           | 0              | 328.8409         | 8                    |
| 5.   | 49.670             | 1030.942 | 300.050      | 8              | 1.2955  | 0           | 0              | 342.8244         | 5                    |
| 6.   | 34.303             | 1055.849 | 292.437      | 7              | 2.6775  | 0           | 0              | 340.8516         | 5                    |
| 7.   | 83.034             | 1083.036 | 339.623      | 9              | 2.0264  | 1           | 0              | 358.8238         | 8                    |
| 8.   | 71.756             | 1297.145 | 323.532      | 9              | 3.4444  | 1           | 0              | 434.9198         | 10                   |
| 9.   | 127.346            | 1124.004 | 374.276      | 10             | 0.7882  | 2           | 0              | 374.8232         | 9                    |
| 10.  | 183.253            | 1331.860 | 425.484      | 13             | -1.1538 | 3           | 0              | 473.9112         | 12                   |
| 11.  | 56.549             | 867.528  | 275.754      | 7              | 2.0154  | 0           | 0              | 287.7459         | 5                    |
| 12.  | 118.914            | 1479.006 | 440.206      | 12             | 3.1768  | 3           | 1              | 545.0337         | 12                   |
| 13.  | 176.800            | 1470.734 | 409.156      | 12             | 1.4688  | 3           | 0              | 486.9961         | 14                   |
| 14.  | 42.977             | 1338.142 | 315.506      | 8              | 4.3696  | 1           | 0              | 465.4225         | 8                    |
| 15.  | 43.030             | 1390.771 | 302.718      | 8              | 4.7496  | 1           | 0              | 479.4491         | 8                    |
| 16.  | 34.469             | 1201.483 | 341.483      | 8              | 2.3295  | 0           | 0              | 404.3379         | 7                    |
| 17.  | 70.710             | 1452.356 | 343.600      | 9              | 5.1552  | 1           | 2              | 511.0157         | 12                   |
| 18.  | 74.499             | 1342.959 | 335.740      | 10             | 3.2898  | 1           | 0              | 464.9458         | 12                   |
| 19.  | 95.669             | 1306.901 | 408.794      | 11             | 2.0778  | 2           | 0              | 443.9283         | 10                   |
| 20.  | 38.187             | 1444.600 | 337.463      | 8              | 3.8386  | 1           | 0              | 479.4491         | 9                    |

**Table S2.** Position on cellulose sheet and structure of array of artificial peptide receptors.

| <b>Position</b> | <b>ADP structure</b>                                              |
|-----------------|-------------------------------------------------------------------|
| A1              | n-decanoyl-AA-NH-C <sub>6</sub> H <sub>4</sub> -NH-DMT-cellulose  |
| A2              | n-heptanoyl-AA-NH-C <sub>6</sub> H <sub>4</sub> -NH-DMT-cellulose |
| A3              | n-decanoyl-RA-NH-C <sub>6</sub> H <sub>4</sub> -NH-DMT-cellulose  |
| A4              | n-heptanoyl-RA-NH-C <sub>6</sub> H <sub>4</sub> -NH-DMT-cellulose |
| A5              | n-decanoyl-NA-NH-C <sub>6</sub> H <sub>4</sub> -NH-DMT-cellulose  |
| A6              | n-heptanoyl-NA-NH-C <sub>6</sub> H <sub>4</sub> -NH-DMT-cellulose |
| A7              | n-decanoyl-DA-NH-C <sub>6</sub> H <sub>4</sub> -NH-DMT-cellulose  |
| A8              | n-heptanoyl-DA-NH-C <sub>6</sub> H <sub>4</sub> -NH-DMT-cellulose |
| A9              | n-decanoyl-CA-NH-C <sub>6</sub> H <sub>4</sub> -NH-DMT-cellulose  |
| A10             | n-heptanoyl-CA-NH-C <sub>6</sub> H <sub>4</sub> -NH-DMT-cellulose |
| A11             | n-decanoyl-QA-NH-C <sub>6</sub> H <sub>4</sub> -NH-DMT-cellulose  |
| A12             | n-heptanoyl-QA-NH-C <sub>6</sub> H <sub>4</sub> -NH-DMT-cellulose |
| A13             | n-decanoyl-EA-NH-C <sub>6</sub> H <sub>4</sub> -NH-DMT-cellulose  |
| A14             | n-heptanoyl-EA-NH-C <sub>6</sub> H <sub>4</sub> -NH-DMT-cellulose |
| A15             | n-decanoyl-GA-NH-C <sub>6</sub> H <sub>4</sub> -NH-DMT-cellulose  |
| A16             | n-heptanoyl-GA-NH-C <sub>6</sub> H <sub>4</sub> -NH-DMT-cellulose |
| A17             | n-decanoyl-HA-NH-C <sub>6</sub> H <sub>4</sub> -NH-DMT-cellulose  |
| A18             | n-heptanoyl-HA-NH-C <sub>6</sub> H <sub>4</sub> -NH-DMT-cellulose |
| A19             | n-decanoyl-IA-NH-C <sub>6</sub> H <sub>4</sub> -NH-DMT-cellulose  |
| A20             | n-heptanoyl-IA-NH-C <sub>6</sub> H <sub>4</sub> -NH-DMT-cellulose |
| B1              | n-decanoyl-LA-NH-C <sub>6</sub> H <sub>4</sub> -NH-DMT-cellulose  |
| B2              | n-heptanoyl-LA-NH-C <sub>6</sub> H <sub>4</sub> -NH-DMT-cellulose |
| B3              | n-decanoyl-KA-NH-C <sub>6</sub> H <sub>4</sub> -NH-DMT-cellulose  |
| B4              | n-heptanoyl-KA-NH-C <sub>6</sub> H <sub>4</sub> -NH-DMT-cellulose |
| B5              | n-decanoyl-MA-NH-C <sub>6</sub> H <sub>4</sub> -NH-DMT-cellulose  |
| B6              | n-heptanoyl-MA-NH-C <sub>6</sub> H <sub>4</sub> -NH-DMT-cellulose |
| B7              | n-decanoyl-FA-NH-C <sub>6</sub> H <sub>4</sub> -NH-DMT-cellulose  |
| B8              | n-heptanoyl-FA-NH-C <sub>6</sub> H <sub>4</sub> -NH-DMT-cellulose |
| B9              | n-decanoyl-PA-NH-C <sub>6</sub> H <sub>4</sub> -NH-DMT-cellulose  |
| B10             | n-heptanoyl-PA-NH-C <sub>6</sub> H <sub>4</sub> -NH-DMT-cellulose |
| B11             | n-decanoyl-SA-NH-C <sub>6</sub> H <sub>4</sub> -NH-DMT-cellulose  |
| B12             | n-heptanoyl-SA-NH-C <sub>6</sub> H <sub>4</sub> -NH-DMT-cellulose |
| B13             | n-decanoyl-TA-NH-C <sub>6</sub> H <sub>4</sub> -NH-DMT-cellulose  |
| B14             | n-heptanoyl-TA-NH-C <sub>6</sub> H <sub>4</sub> -NH-DMT-cellulose |
| B15             | n-decanoyl-WA-NH-C <sub>6</sub> H <sub>4</sub> -NH-DMT-cellulose  |
| B16             | n-heptanoyl-WA-NH-C <sub>6</sub> H <sub>4</sub> -NH-DMT-cellulose |
| B17             | n-decanoyl-YA-NH-C <sub>6</sub> H <sub>4</sub> -NH-DMT-cellulose  |
| B18             | n-heptanoyl-YA-NH-C <sub>6</sub> H <sub>4</sub> -NH-DMT-cellulose |
| B19             | n-decanoyl-VA-NH-C <sub>6</sub> H <sub>4</sub> -NH-DMT-cellulose  |
| B20             | n-heptanoyl-VA-NH-C <sub>6</sub> H <sub>4</sub> -NH-DMT-cellulose |
| C1              | n-decanoyl-AF-NH-C <sub>6</sub> H <sub>4</sub> -NH-DMT-cellulose  |
| C2              | n-heptanoyl-AF-NH-C <sub>6</sub> H <sub>4</sub> -NH-DMT-cellulose |
| C3              | n-decanoyl-RF-NH-C <sub>6</sub> H <sub>4</sub> -NH-DMT-cellulose  |
| C4              | n-heptanoyl-RF-NH-C <sub>6</sub> H <sub>4</sub> -NH-DMT-cellulose |
| C5              | n-decanoyl-NF-NH-C <sub>6</sub> H <sub>4</sub> -NH-DMT-cellulose  |
| C6              | n-heptanoyl-NF-NH-C <sub>6</sub> H <sub>4</sub> -NH-DMT-cellulose |
| C7              | n-decanoyl-DF-NH-C <sub>6</sub> H <sub>4</sub> -NH-DMT-cellulose  |
| C8              | n-heptanoyl-DF-NH-C <sub>6</sub> H <sub>4</sub> -NH-DMT-cellulose |
| C9              | n-decanoyl-CF-NH-C <sub>6</sub> H <sub>4</sub> -NH-DMT-cellulose  |
| C10             | n-heptanoyl-CF-NH-C <sub>6</sub> H <sub>4</sub> -NH-DMT-cellulose |
| C11             | n-decanoyl-QF-NH-C <sub>6</sub> H <sub>4</sub> -NH-DMT-cellulose  |

|     |                                                                   |
|-----|-------------------------------------------------------------------|
| C12 | n-heptanoyl-QF-NH-C <sub>6</sub> H <sub>4</sub> -NH-DMT-cellulose |
| C13 | n-decanoyl-EF-NH-C <sub>6</sub> H <sub>4</sub> -NH-DMT-cellulose  |
| C14 | n-heptanoyl-EF-NH-C <sub>6</sub> H <sub>4</sub> -NH-DMT-cellulose |
| C15 | n-decanoyl-GF-NH-C <sub>6</sub> H <sub>4</sub> -NH-DMT-cellulose  |
| C16 | n-heptanoyl-GF-NH-C <sub>6</sub> H <sub>4</sub> -NH-DMT-cellulose |
| C17 | n-decanoyl-HF-NH-C <sub>6</sub> H <sub>4</sub> -NH-DMT-cellulose  |
| C18 | n-heptanoyl-HF-NH-C <sub>6</sub> H <sub>4</sub> -NH-DMT-cellulose |
| C19 | n-decanoyl-IF-NH-C <sub>6</sub> H <sub>4</sub> -NH-DMT-cellulose  |
| C20 | n-heptanoyl-IF-NH-C <sub>6</sub> H <sub>4</sub> -NH-DMT-cellulose |
| D1  | n-decanoyl-LF-NH-C <sub>6</sub> H <sub>4</sub> -NH-DMT-cellulose  |
| D2  | n-heptanoyl-LF-NH-C <sub>6</sub> H <sub>4</sub> -NH-DMT-cellulose |
| D3  | n-decanoyl-KF-NH-C <sub>6</sub> H <sub>4</sub> -NH-DMT-cellulose  |
| D4  | n-heptanoyl-KF-NH-C <sub>6</sub> H <sub>4</sub> -NH-DMT-cellulose |
| D5  | n-decanoyl-MF-NH-C <sub>6</sub> H <sub>4</sub> -NH-DMT-cellulose  |
| D6  | n-heptanoyl-MF-NH-C <sub>6</sub> H <sub>4</sub> -NH-DMT-cellulose |
| D7  | n-decanoyl-FF-NH-C <sub>6</sub> H <sub>4</sub> -NH-DMT-cellulose  |
| D8  | n-heptanoyl-FF-NH-C <sub>6</sub> H <sub>4</sub> -NH-DMT-cellulose |
| D9  | n-decanoyl-PF-NH-C <sub>6</sub> H <sub>4</sub> -NH-DMT-cellulose  |
| D10 | n-heptanoyl-PF-NH-C <sub>6</sub> H <sub>4</sub> -NH-DMT-cellulose |
| D11 | n-decanoyl-SF-NH-C <sub>6</sub> H <sub>4</sub> -NH-DMT-cellulose  |
| D12 | n-heptanoyl-SF-NH-C <sub>6</sub> H <sub>4</sub> -NH-DMT-cellulose |
| D13 | n-decanoyl-TF-NH-C <sub>6</sub> H <sub>4</sub> -NH-DMT-cellulose  |
| D14 | n-heptanoyl-TF-NH-C <sub>6</sub> H <sub>4</sub> -NH-DMT-cellulose |
| D15 | n-decanoyl-WF-NH-C <sub>6</sub> H <sub>4</sub> -NH-DMT-cellulose  |
| D16 | n-heptanoyl-WF-NH-C <sub>6</sub> H <sub>4</sub> -NH-DMT-cellulose |
| D17 | n-decanoyl-YF-NH-C <sub>6</sub> H <sub>4</sub> -NH-DMT-cellulose  |
| D18 | n-heptanoyl-YF-NH-C <sub>6</sub> H <sub>4</sub> -NH-DMT-cellulose |
| D19 | n-decanoyl-VF-NH-C <sub>6</sub> H <sub>4</sub> -NH-DMT-cellulose  |
| D20 | n-heptanoyl-VF-NH-C <sub>6</sub> H <sub>4</sub> -NH-DMT-cellulose |
| E1  | n-decanoyl-AP-NH-C <sub>6</sub> H <sub>4</sub> -NH-DMT-cellulose  |
| E2  | n-heptanoyl-AP-NH-C <sub>6</sub> H <sub>4</sub> -NH-DMT-cellulose |
| E3  | n-decanoyl-RP-NH-C <sub>6</sub> H <sub>4</sub> -NH-DMT-cellulose  |
| E4  | n-heptanoyl-RP-NH-C <sub>6</sub> H <sub>4</sub> -NH-DMT-cellulose |
| E5  | n-decanoyl-NP-NH-C <sub>6</sub> H <sub>4</sub> -NH-DMT-cellulose  |
| E6  | n-heptanoyl-NP-NH-C <sub>6</sub> H <sub>4</sub> -NH-DMT-cellulose |
| E7  | n-decanoyl-DP-NH-C <sub>6</sub> H <sub>4</sub> -NH-DMT-cellulose  |
| E8  | n-heptanoyl-DP-NH-C <sub>6</sub> H <sub>4</sub> -NH-DMT-cellulose |
| E9  | n-decanoyl-CP-NH-C <sub>6</sub> H <sub>4</sub> -NH-DMT-cellulose  |
| E10 | n-heptanoyl-CP-NH-C <sub>6</sub> H <sub>4</sub> -NH-DMT-cellulose |
| E11 | n-decanoyl-QP-NH-C <sub>6</sub> H <sub>4</sub> -NH-DMT-cellulose  |
| E12 | n-heptanoyl-QP-NH-C <sub>6</sub> H <sub>4</sub> -NH-DMT-cellulose |
| E13 | n-decanoyl-EP-NH-C <sub>6</sub> H <sub>4</sub> -NH-DMT-cellulose  |
| E14 | n-heptanoyl-EP-NH-C <sub>6</sub> H <sub>4</sub> -NH-DMT-cellulose |
| E15 | n-decanoyl-GP-NH-C <sub>6</sub> H <sub>4</sub> -NH-DMT-cellulose  |
| E16 | n-heptanoyl-GP-NH-C <sub>6</sub> H <sub>4</sub> -NH-DMT-cellulose |
| E17 | n-decanoyl-HP-NH-C <sub>6</sub> H <sub>4</sub> -NH-DMT-cellulose  |
| E18 | n-heptanoyl-HP-NH-C <sub>6</sub> H <sub>4</sub> -NH-DMT-cellulose |
| E19 | n-decanoyl-IP-NH-C <sub>6</sub> H <sub>4</sub> -NH-DMT-cellulose  |
| E20 | n-heptanoyl-IP-NH-C <sub>6</sub> H <sub>4</sub> -NH-DMT-cellulose |
| F1  | n-decanoyl-LP-NH-C <sub>6</sub> H <sub>4</sub> -NH-DMT-cellulose  |
| F2  | n-heptanoyl-LP-NH-C <sub>6</sub> H <sub>4</sub> -NH-DMT-cellulose |
| F3  | n-decanoyl-KP-NH-C <sub>6</sub> H <sub>4</sub> -NH-DMT-cellulose  |
| F4  | n-heptanoyl-KP-NH-C <sub>6</sub> H <sub>4</sub> -NH-DMT-cellulose |
| F5  | n-decanoyl-MP-NH-C <sub>6</sub> H <sub>4</sub> -NH-DMT-cellulose  |
| F6  | n-heptanoyl-MP-NH-C <sub>6</sub> H <sub>4</sub> -NH-DMT-cellulose |

|            |                                                                   |
|------------|-------------------------------------------------------------------|
| <b>F7</b>  | n-decanoyl-FP-NH-C <sub>6</sub> H <sub>4</sub> -NH-DMT-cellulose  |
| <b>F8</b>  | n-heptanoyl-FP-NH-C <sub>6</sub> H <sub>4</sub> -NH-DMT-cellulose |
| <b>F9</b>  | n-decanoyl-PP-NH-C <sub>6</sub> H <sub>4</sub> -NH-DMT-cellulose  |
| <b>F10</b> | n-heptanoyl-PP-NH-C <sub>6</sub> H <sub>4</sub> -NH-DMT-cellulose |
| <b>F11</b> | n-decanoyl-SP-NH-C <sub>6</sub> H <sub>4</sub> -NH-DMT-cellulose  |
| <b>F12</b> | n-heptanoyl-SP-NH-C <sub>6</sub> H <sub>4</sub> -NH-DMT-cellulose |
| <b>F13</b> | n-decanoyl-TP-NH-C <sub>6</sub> H <sub>4</sub> -NH-DMT-cellulose  |
| <b>F14</b> | n-heptanoyl-TP-NH-C <sub>6</sub> H <sub>4</sub> -NH-DMT-cellulose |
| <b>F15</b> | n-decanoyl-WP-NH-C <sub>6</sub> H <sub>4</sub> -NH-DMT-cellulose  |
| <b>F16</b> | n-heptanoyl-WP-NH-C <sub>6</sub> H <sub>4</sub> -NH-DMT-cellulose |
| <b>F17</b> | n-decanoyl-YP-NH-C <sub>6</sub> H <sub>4</sub> -NH-DMT-cellulose  |
| <b>F18</b> | n-heptanoyl-YP-NH-C <sub>6</sub> H <sub>4</sub> -NH-DMT-cellulose |
| <b>F19</b> | n-decanoyl-VP-NH-C <sub>6</sub> H <sub>4</sub> -NH-DMT-cellulose  |
| <b>F20</b> | n-heptanoyl-VP-NH-C <sub>6</sub> H <sub>4</sub> -NH-DMT-cellulose |

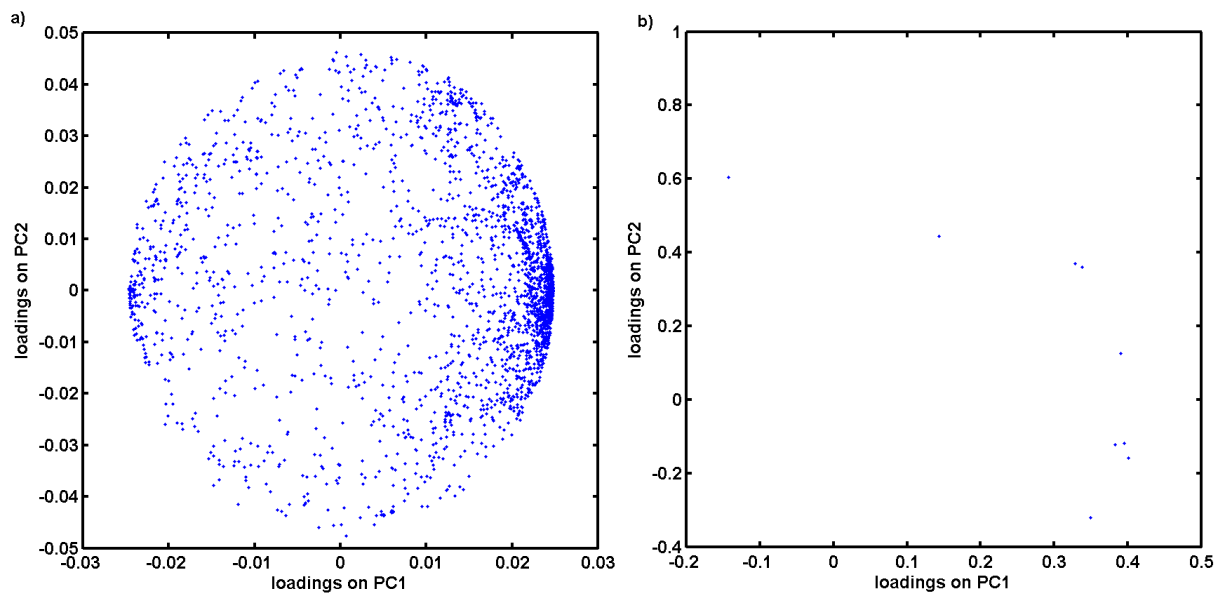

**Figure S1.** Projection of variables on plane defined by first and second loadings for Dragon (a) and Sybyl (b) parameters.
